# Supplementary material for: Phage Resistance Evolution Induces the Sensitivity of Specific Antibiotics in Pseudomonas aeruginosa PAO1
Source: PubMed Central journal article supplement (PMC9603957; doi:10.1128/spectrum.01356-22), 2022-08-16
Supplement: spectrum.01356-22-s0001.pdf [file spectrum.01356-22-s0001.pdf]

## Supporting Information

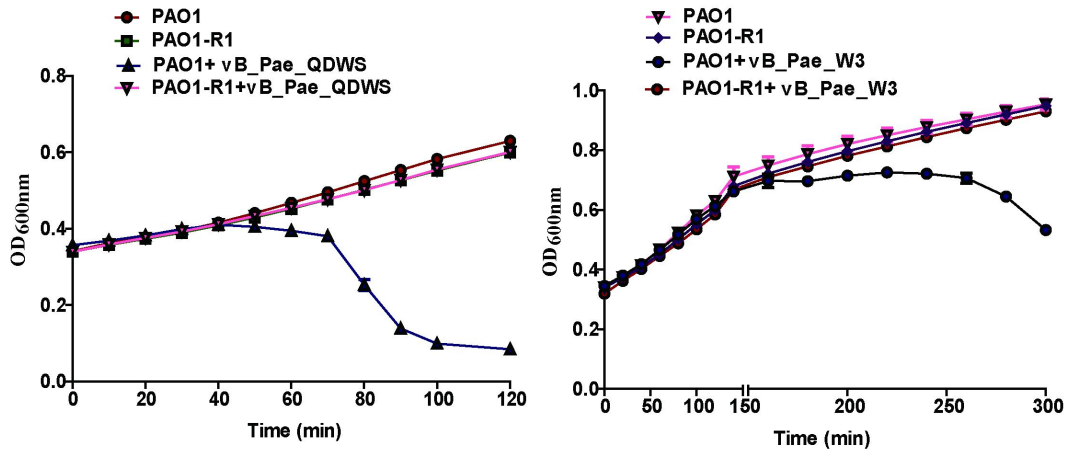

**Fig. 1** Characterization of the phage-resistant strain PAO1-R1. Growth curves of PAO1 and PAO1-R1 infected with phage vB\_Pae\_QDWS or vB\_Pae\_W3 at an MOI of 0.1 in a 96-well microtiter plate containing 200  $\mu$ L cultures were detected by a multi-mode reader. The values were the averages of three measures with standard deviation.

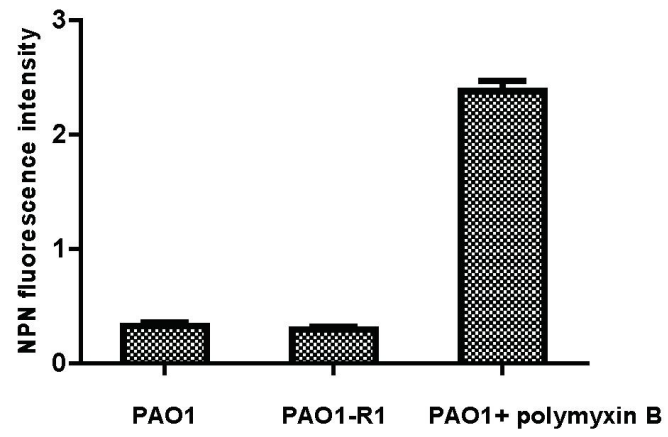

**Fig. 2** Outer membrane permeabilization assays of PAO1 and PAO1-R1.

**Table 1 SNPs found in PAO1-R1 using *P. aeruginosa* PAO1 as reference.**

| <b>Gene name</b> | <b>Amino acid substitution</b> | <b>Product</b>                                                    |
|------------------|--------------------------------|-------------------------------------------------------------------|
| PA0056           | Ala230Pro                      | Probable transcriptional regulator                                |
| <i>prlC</i>      | Gly405Ala                      | Oligopeptidase A                                                  |
| PA0116           | Gly21Asp                       | HTH hxlR-type domain-containing protein                           |
| PA0159           | Cys310Trp                      | Probable transcriptional regulator                                |
| <i>pntB</i>      | Gln168*                        | NAD(P) transhydrogenase subunit beta                              |
| PA0202           | Ala242Val                      | Probable amidase                                                  |
| <i>mdcD</i>      | Ala246Thr                      | Malonate decarboxylase beta subunit                               |
| <i>cysW</i>      | Gly21Ala                       | Sulfate transport protein CysW                                    |
| <i>glpQ</i>      | Ala24Pro                       | Glycerophosphoryl diester phosphodiesterase, periplasmic          |
| PA0716           | Ile45Thr                       | AAA domain-containing protein                                     |
| <i>lepA</i>      | Leu461Phe                      | Elongation factor 4                                               |
| <i>putA</i>      | Pro512Leu                      | Bifunctional protein PutA                                         |
| PA0801           | Gln108His                      | Uncharacterized protein                                           |
| PA0839           | Ala58Thr                       | Probable transcriptional regulator                                |
| PA0847           | Ala376Val                      | Uncharacterized protein                                           |
| <i>phhC</i>      | Thr131Ile                      | Aromatic-amino-acid aminotransferase                              |
| <i>aruE</i>      | Gly121Asp                      | Succinylglutamate desuccinylase                                   |
| <i>tolA</i>      | Ala241Thr                      | Tol-Pal system protein TolA                                       |
| <i>pyoS5</i>     | Ser343Leu                      | Pyocin S5                                                         |
| <i>fliF</i>      | Gly156Asp                      | Flagellar M-ring protein                                          |
| PA1108           | Ala282Gly                      | Probable major facilitator superfamily (MFS) transporter          |
| <i>kefB</i>      | Lys393Asn                      | Glutathione-regulated potassium-efflux system protein KefB        |
| PA1208           | Gly477Ala                      | Uncharacterized protein                                           |
| PA1245           | Ala30Pro                       | AprX protein                                                      |
| PA1255           | Pro30Ser                       | Probable trans-3-hydroxy-L-proline dehydratase                    |
| <i>pmpM</i>      | Val268Met                      | Multidrug resistance protein PmpM                                 |
| <i>cheB1</i>     | Gly34Ala                       | glutamate methylesterase/protein-glutamine glutaminase 1          |
| PA1611           | Ala508Pro                      | Histidine kinase                                                  |
| <i>pcrD</i>      | Gly489Ser                      | Type III secretory apparatus protein PcrD                         |
| <i>cysS</i>      | Ala377Gly                      | Cysteine-tRNA ligase                                              |
| PA1923           | Ala295Gly                      | Putative Cobalamin biosynthesis protein CobN                      |
| PA1955           | Ala92Gly                       | Uncharacterized protein                                           |
| <i>liuD</i>      | Ala368Gly                      | Methylcrotonyl-CoA carboxylase, alpha-subunit (Biotin-containing) |

---

|             |                         |                                                               |
|-------------|-------------------------|---------------------------------------------------------------|
| <i>pslF</i> | Ala42Pro                | PsIF, Glycosyltransferase                                     |
| PA2271      | Gly96Ala                | Acetyltransferase                                             |
| PA2375      | Ala66Pro                | Uncharacterized protein                                       |
| PA2383      | Ala158Gly               | Probable transcriptional regulator                            |
| <i>pvdJ</i> | Pro819Ala               | Amino acid adenylation domain-containing protein              |
| PA2409      | Ala16Pro                | Probable permease of ABC transporter                          |
| <i>mexT</i> | Phe172Ile,<br>Phe272Leu | Transcriptional regulator MexT                                |
| PA2503      | Ala364Gly               | Uncharacterized protein                                       |
| PA2541      | Ala165Gly               | Probable CDP-alcohol phosphatidyltransferase                  |
| PA3173      | Ala28Pro                | Probable short-chain dehydrogenase                            |
| <i>gltR</i> | Ala234Gly               | Two-component response regulator GltR                         |
| PA3259      | Ser111Thr               | Uncharacterized protein                                       |
| PA3318      | Ala16Pro                | Uncharacterized protein                                       |
| PA3455      | Ala129Thr               | Polyphosphate:AMP phosphotransferase                          |
| PA3522      | Ala219Gly               | Efflux pump membrane transporter                              |
| <i>fruI</i> | Ala893Gly               | Phosphocarrier protein HPr                                    |
| PA3760      | His636Arg               | Phosphoenolpyruvate--protein phosphotransferase               |
| <i>hpaA</i> | Ala49Pro                | 4-hydroxyphenylacetate 3-monooxygenase oxygenase<br>component |
| <i>acoB</i> | Ala81Pro                | Acetoin catabolism protein AcoB                               |
| PA4179      | Ala274Gly               | Probable porin                                                |
| <i>pprA</i> | Ala916Gly               | Two-component sensor PprA                                     |
| PA4341      | Glu158Asp               | Probable transcriptional regulator                            |
| PA4394      | Val178Leu               | Putative mechanosensitive ion channel family protein          |
| <i>proB</i> | Ala225Gly               | Glutamate 5-kinase                                            |
| PA4968      | Ala29Gly                | Uncharacterized protein                                       |
| <i>pilQ</i> | Lys693Glu,<br>Val642Ile | Fimbrial assembly protein PilQ                                |
| PA5093      | Ala173Gly               | Probable histidine/phenylalanine ammonia-lyase                |
| <i>hutU</i> | Thr431Arg               | Urocanate hydratase                                           |
| <i>hutC</i> | His42Pro                | Histidine utilization repressor                               |
| <i>phoU</i> | Ala83Pro                | Phosphate-specific transport system accessory protein PhoU    |
| <i>mtr</i>  | Lys286Asn               | Aromatic amino acid permease                                  |

---

**Table 2 Identified InDels in the genome of PAO1-R1 with the reference sequence of *P. aeruginosa* PAO1.**

| Genome Position | REF | ALT     | Functional Annotations                                     | Putative impact |
|-----------------|-----|---------|------------------------------------------------------------|-----------------|
| 169283          | CG  | C       | PA0144<br>Putative nucleoside 2-deoxyribosyltransferase    | Modifier        |
| 411125          | AC  | A       | <i>fdx1</i><br>Ferredoxin (4Fe-4S)                         | Modifier        |
| 667028          | G   | GC      | PA0605<br>Probable permease of ABC transporter             | Modifier        |
| 740419          | G   | GC      | PA0683<br>Probable type II secretion system protein        | High            |
| 816529          | G   | GC      | PA0744<br>Probable enoyl-CoA hydratase/isomerase           | Modifier        |
| 891099          | A   | AC      | PA0809<br>Divalent metal cation transporter MntH 2         | Modifier        |
| 1116213         | G   | GC      | PA1026<br>Uncharacterized protein                          | Modifier        |
| 1215657         | A   | AG      | PA1117<br>Uncharacterized protein                          | Modifier        |
| 1275766         | GA  | G       | <i>napA</i><br>Periplasmic nitrate reductase               | High            |
| 1440622         | CA  | C       | PA1327<br>Serine protease                                  | High            |
| 1445357         | A   | AG      | PA1328<br>Probable transcriptional regulator               | Modifier        |
| 1467482         | A   | AG      | PA1347<br>Probable transcriptional regulator               | Modifier        |
| 1467483         | C   | CG      | PA1347<br>Probable transcriptional regulator               | Modifier        |
| 1835045         | G   | GC      | <i>mtnC</i><br>Enolase-phosphatase E1                      | High            |
| 1844903         | T   | TGTTGGC | <i>pscP</i><br>Translocation protein in type III secretion | Moderate        |
| 2169348         | A   | AG      | <i>agmR</i><br>Glycerol metabolism activator               | Modifier        |
| 2186927         | G   | GC      | PA1995, Uncharacterized protein                            | Modifier        |
| 2195457         | G   | GC      | <i>bdhA</i><br>3-hydroxybutyrate dehydrogenase             | Modifier        |
| 2239555         | A   | AG      | PA2044                                                     | Modifier        |

|         |                                 |      |                                                                 |          |
|---------|---------------------------------|------|-----------------------------------------------------------------|----------|
|         |                                 |      | Putative cysteine protease<br>PA2296                            | Modifier |
| 2532046 | G                               | GC   | Putative ABC transporter<br>substrate-binding protein<br>PA2449 | Modifier |
| 2753522 | G                               | GC   | Transcriptional regulatory<br>protein TyrR<br>PA2492            | High     |
| 2807693 | TCGGCCAGC                       | T    | Transcriptional regulator<br>MexT<br>PA2662                     | Modifier |
| 3016844 | G                               | GC   | Uncharacterized protein<br>PA2729                               | Modifier |
| 3083196 | A                               | AG   | Uncharacterized protein                                         | High     |
| 3777109 | CAGGCCCCGG<br>TCGCCATCGC<br>CGG | C    | <i>amiE</i><br>Aliphatic amidase                                | Modifier |
| 3919508 | G                               | GC   | Uncharacterized protein<br><i>ribH</i>                          | Modifier |
| 4539468 | G                               | GC   | 6,7-dimethyl-8-<br>ribityllumazine synthase<br>PA4357           | Modifier |
| 4888194 | A                               | AG   | FeoC domain-containing<br>protein<br>PA4492                     | Modifier |
| 5033101 | G                               | GC   | DUF2135 domain-<br>containing protein<br>PA4523                 | Modifier |
| 5071543 | AACTG                           | A    | Uncharacterized protein<br>PA4870                               | Modifier |
| 5472415 | C                               | CG   | DksA C4-type domain-<br>containing protein<br>PA5024            | Moderate |
| 5655220 | C                               | CCGG | Probable membrane<br>transporter protein                        |          |
